# Supplementary material for: Regulation of Protein Citrullination through p53/PADI4 Network in DNA Damage Response
Source: Oxford University Press journal article supplement (doi:10.1158/0008-5472.can-09-2280), 2009-10-20
Supplement: 00085472can092280-sup-can_11-15-09_tanikawa.pdf [file 00085472can092280-sup-can_11-15-09_tanikawa.pdf]

## Supplementary Figure S1

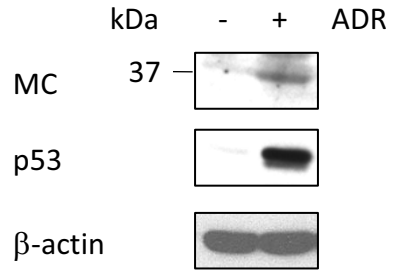

**Figure S1.**

HCT116 cells were treated with 2  $\mu$ g/ml of ADR for 2 h. At 36 h after treatment, cells were harvested. Whole cell extracts were subjected to immunoblotting with anti-modified citrulline (MC) or anti-p53 antibody.

## Supplementary Figure S2

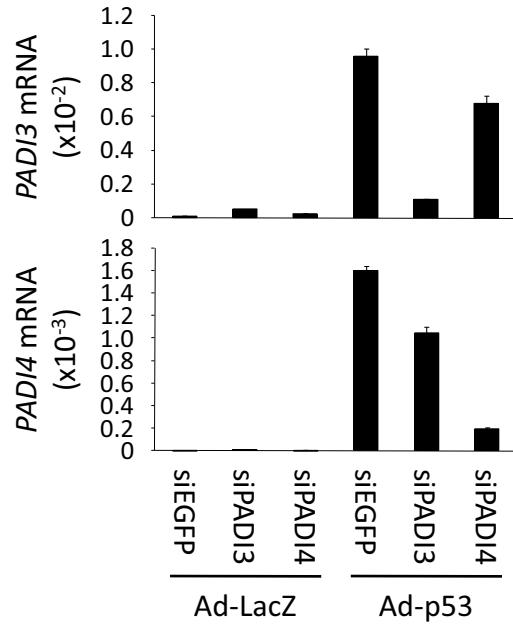

**Figure S2.**

At 6 h after transfection with each siRNA, U373MG cells were infected with Ad-p53 or Ad-LacZ. At 36 h after infection, mRNA levels of PADI3 (upper) and PADI4 (lower) were analyzed by qPCR analysis. Relative expression was shown with standard deviations (n=2).

## Supplementary Figure S3

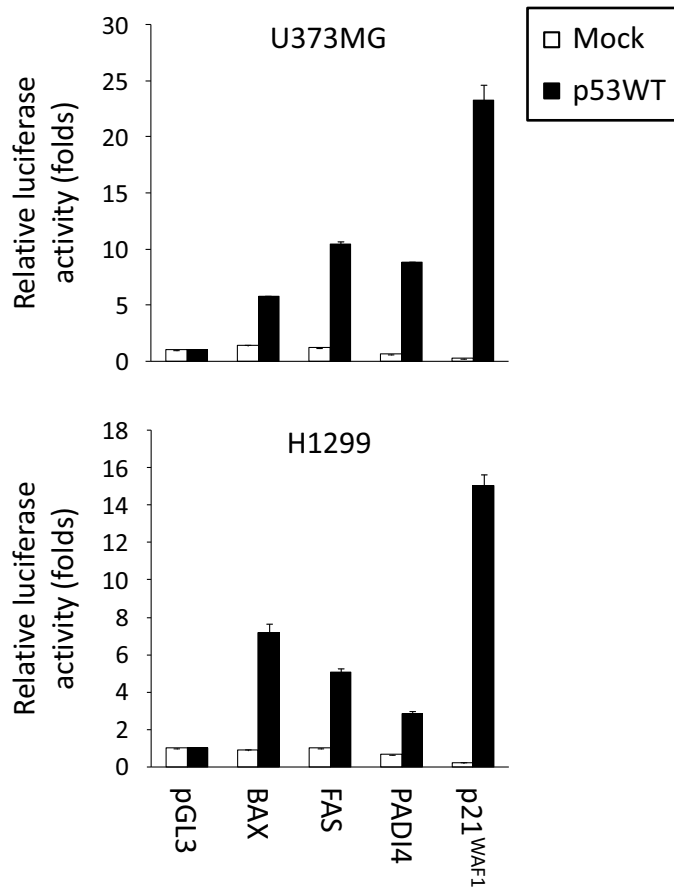

**Figure S3.**

Results of luciferase assay of p53BS-AB (PADI4) are shown. Luciferase activity is indicated relative to the activity of mock vector with standard deviations (n=2). Reporter plasmids which contain p53-responsive elements of BAX, FAS, and p21<sup>WAF1</sup> were used as positive controls.

## Supplementary Figure S4

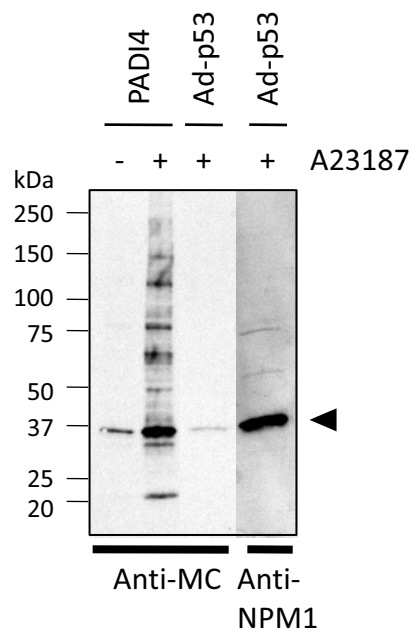

**Figure S4.**

HEK293T cells were transfected with plasmid expressing HA-PADI4 (lane 1 and 2). U373MG cells were infected with Ad-p53 at 20 MOI (lane 3 and 4). At 48 h after treatment, cells were cultured with or without 5  $\mu$ M of A23187 for 1 h, followed by immunoblotting with anti-MC or anti-NPM1 antibody. Arrowhead on the right indicates the band corresponding to NPM1 protein.

## Supplementary Figure S5

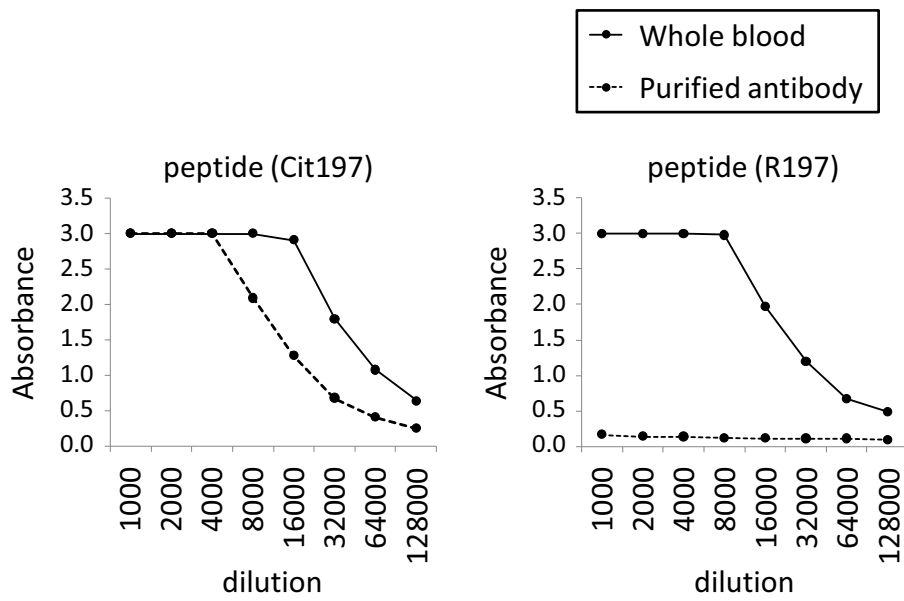

**Figure S5.**

Generation of antibody against citrulinated NPM1 at arginine 197 residue. Antibody titers and specificity were determined by enzyme-linked immunosorbent assay (ELISA) using peptide Cit197 that was used for immunization and peptide Arg 197 that was used for adsorption.

## Supplementary Figure S6

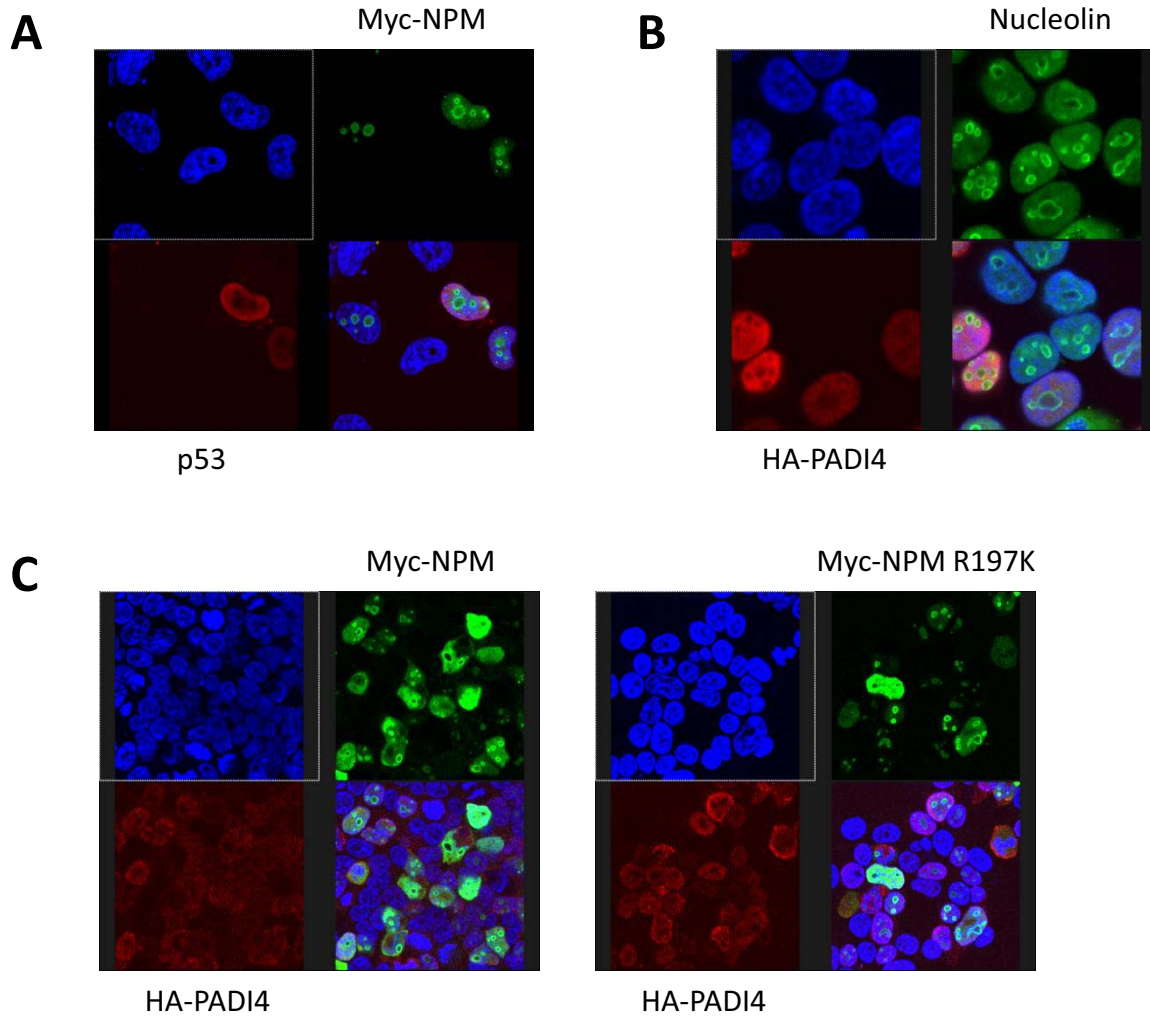

**Figure S6.**

A, Subcellular distribution of NPM1 proteins was examined by immunocytochemistry. At 36 h after co-transfection of plasmid expressing myc-NPM1 with p53, H1299 cells were fixed and stained with anti-myc antibody (Alexa fluor 488) and anti-p53 antibody (Alexa fluor 594). B, Subcellular distribution of Nucleolin proteins was examined by immunocytochemistry. At 36 h after transfection with plasmid expressing HA-PAD14, HEK293T cells were fixed and stained with anti-nucleolin antibody (Alexa fluor 488) and anti-HA antibody (Alexa fluor 594). C, Subcellular distribution of NPM1 proteins was examined by immunocytochemistry. At 36 h after co-transfection of plasmid expressing myc-NPM1 or myc-NPM R197K with HA-PAD14, HEK293T cells were fixed and stained with anti-myc antibody (Alexa fluor 488) and anti-HA antibody (Alexa fluor 594).

# Supplementary Table S1

Sequences of primers and RNA nucleotides

| Site-directed mutagenesis | Forward                           | Reverse                           |
|---------------------------|-----------------------------------|-----------------------------------|
| PADI4D350A                | GACCAGTGGATGCAGGCTGAAATGGAGATCGGC | GCCGATCTCCATTCAGCCTGCATCCACTGGTC  |
| PADI4D473A                | TCCGTGGGCCACGTGGCCGAGTTCCTGAGCTTT | AAAGCTCAGGAACTCGGCCACGTGGCCCACGGA |

  

| siRNA oligonucleotides | Sense                 | Antisense             |
|------------------------|-----------------------|-----------------------|
| siNPM1                 | GGACAAGAAUCCUUCAAGATT | UCUUGAAGGAUUCUUGUCCTT |
| siPADI3                | CCACAAAACUUGUCCUCAUTT | AUGGAGGACAAGUUUGUGGTT |
| siPADI4                | GGUCCUGCUACAAACUGUUTT | AACAGUUUGUAGCAGGACCTT |
| si53                   | GACUCCAGUGGUAUUCUACTT | GUAGAUUACCACUGGAGUCTT |
| siEGFP                 | GCAGCACGACUUCUUCAAGTT | CUUGAAGAAGUCGUGUCGCTT |

  

| Quantitative real-time PCR | Forward               | Reverse                 |
|----------------------------|-----------------------|-------------------------|
| PADI1                      | CATGACGCCCAACTCA      | GAGCCATGAGTGTCATCAC     |
| PADI2                      | AGAGCCTTGTGCAGGAGAAC  | AGGATGTCACGGTTCAGTC     |
| PADI3                      | GCCTTCTTCCTGACTTGGT   | AGCAGCAGCCATTGATGA      |
| PADI4                      | TTCTCTAAGGCGGAAGCTTTT | AGCAGGGAACACACCTTCTC    |
| PADI6                      | CAGGTGCCTCTGGAGGTTTA  | TCGTCACTGTGTCCACAAAAC   |
| B2M                        | TTCTGGCCTGGAGGCTATC   | TCAGGAAATTTGACTTTCCATTC |

  

| ChIP assay / Gene reporter assays | Forward              | Reverse              |
|-----------------------------------|----------------------|----------------------|
| PAD4BS-A                          | TGGGTGTGAAGGAAATGACA | CCAAGGCCATTGAATGAGTT |
| PAD4BS-B                          | CACCTCAAGCCACACAGCTA | AAGTGATTTGCCCATCTTGG |
| PAD4BS-AB                         | TGGGTGTGAAGGAAATGACA | AAGTGATTTGCCCATCTTGG |
| BAX                               | AGGCTGAGACGGGGTTATCT | AGGCTGGGCCTGTATCCTAC |
| FAS                               | GAATTGAAGCGGAAGTCTGG | TTAACCACTGCTTCGGTGC  |
| p21 <sup>WAF1</sup>               | ACCTTTCACCATTCCCCTAC | GCCCAAGGACAAAATAGCCA |
